# Supplementary material for: Attention deficit hyperactivity disorder (ADHD) within a South Indian (Keralian) mainstream school context
Source: Royal Society of Chemistry journal article supplement (doi:10.1039/c5fo01480h), 2009-01-01
Supplement: c5fo01480h1.pdf [file c5fo01480h1.pdf]

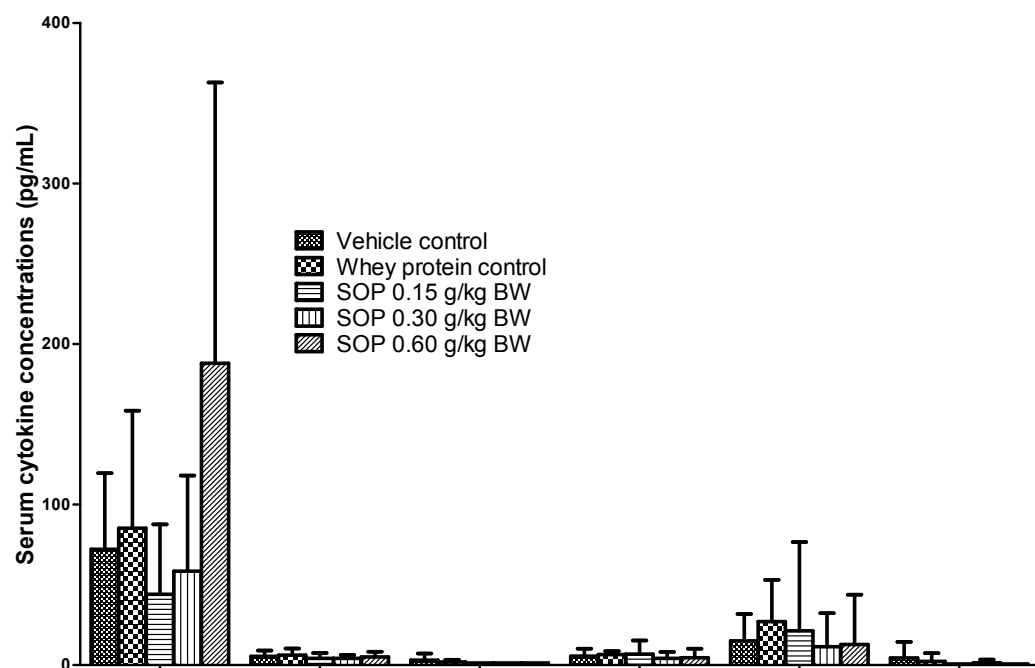

Supplementary Figure. Effects of SOP on serum IL1a, IL-2, IL-4, IL-10, IL-12p70 and IL-17A concentrations in mice. Values represented the mean  $\pm$  SD (n=10 per group), which were analysed by ANOVA test, and followed by least-significant difference (IL-2, IL-10 and IL-12p70) or Dunnett's T3 (IL-1a, IL-4 and IL-17A) for post-hoc test between multiple groups. \*  $p < 0.05$  versus vehicle control group, and #  $p < 0.05$  versus whey protein control group.
